# Supplementary material
Source: PubMed Central journal article supplement (PMC5338715)
Supplement: CJN.08370816SupplementaryData.pdf [file CJN.08370816SupplementaryData.pdf]

**Table S1.** Interview question guide

1. How would you define “patient-centred outcomes”?
2. What does this term (patient-centred outcomes, patient-important outcomes, patient-oriented outcomes) mean to you?
3. Do you apply this concept to your research and/or practice - how?
4. To what extent do you think there is a mismatch between outcomes that regarded as important to patients/caregivers and healthcare providers – why?
5. Have there been times when the patient’s preference conflicts with what is clinically recommended? How do you address this in practice?
6. In clinical practice, can you give examples of complex clinical decisions in caring for patients on hemodialysis? What are the more challenging trade-offs, in terms of outcomes, have you had to consider - why? (*mortality vs. quality of life outcomes*) How did you come to a decision?
7. This is a list of outcomes that were identified and rated by patients/caregivers in a nominal group technique study 43. (Refer to study for results)
8. Is there something else that you would think would be relevant to add or mention?

The interview guide was developed based on a literature review of patient-centered outcomes (1-12), and we integrated the terminology and definitions for patient-centered research and care into the questions and prompts. The multidisciplinary investigator team (nephrologists/physicians, nurses, psychologist, social scientist, patient) reviewed the questions to ensure clarity and that relevant domains were captured. The questions and prompts were revised during subsequent interviews as necessary to capture the range and depth of perspectives.

**References**

1. Audet AM, Davis K, Schoenbaum SC: Adoption of patient-centered care practices by physicians: results from a national survey. *Arch Intern Med*, 166: 754-749, 2006
2. Bardes CL: Defining "patient-centered medicine". *N Engl J Med*, 366: 782-783, 2012
3. Barry MJ, Edgmann-Levitan S: Shared decision making - the pinnacle of patient-centered care. *N Engl J Med*, 366: 780-781, 2012
4. Booth CM: Evaluating patient-centered outcomes in the randomized controlled trial and beyond: informing the future with lessons from the past. *Clin Cancer Res*, 16: 5963-5971, 2010
5. Duggan PS, Geller G, Cooper LA, Beach MC: The moral nature of patient-centeredness: is it "just the right thing to do"? *Patient Educ Couns*, 62: 271-276, 2006
6. Epstein RM, Street RL Jr: The values and value of patient-centered care. *Ann Fam Med*, 9: 100-103, 2011
7. FDA: The patient-reported outcomes (PRO) consortium available at <http://www.fda.gov/aboutfda/partnershipscollaborations/publicprivatepartnershipprogram/ucm231129.htm> (Accessed July 14th 2016). US Department of Health and Humans Services, US Food and Drug Administration, 2010
8. Flythe JE, Powell JD, Poulton CJ, Westreich KD, Handler L, Reeve BB, Carey TS: Patient-reported outcome instruments for physical symptoms among patients receiving maintenance dialysis: a systematic review. *Am J Kidney Disease*, 66: 1033-1046, 2015
9. Frank L, Basch E, Selby JV: The PCORI perspective on patient-centered outcomes research. *J Am Med Assoc*, 312: 1513-1514, 2014

10. Mullins CD, Vandigo J, Zheng Z, Wicks P: Patient-centeredness in the design of clinical trials. *Value Health*, 17: 471-475, 2014
11. O'Hare AM, Armistead N, Schrag WL, Diamond L, Moss AH: Patient-centered care: an opportunity to accomplish the "Three Aims" of the National Quality Strategy in the Medicare ESRD program. *Clin J Am Soc Nephrol*, 9: 2189-2194, 2014
12. Selby JV, Beal AC, Frank L: The Patient-Centered Outcomes Research Institute (PCORI) national priorities for research and initial research agenda. *J Am Med Assoc*, 307: 1583-1584, 2012
